# Supplementary material
Source: Springer Nature journal article supplement (https://www.springermedizin.de/resource/supplementary/13020_2011_134_MOESM2_ESM.pdf/9641050)

# Nanotechnology-based curcumin delivery

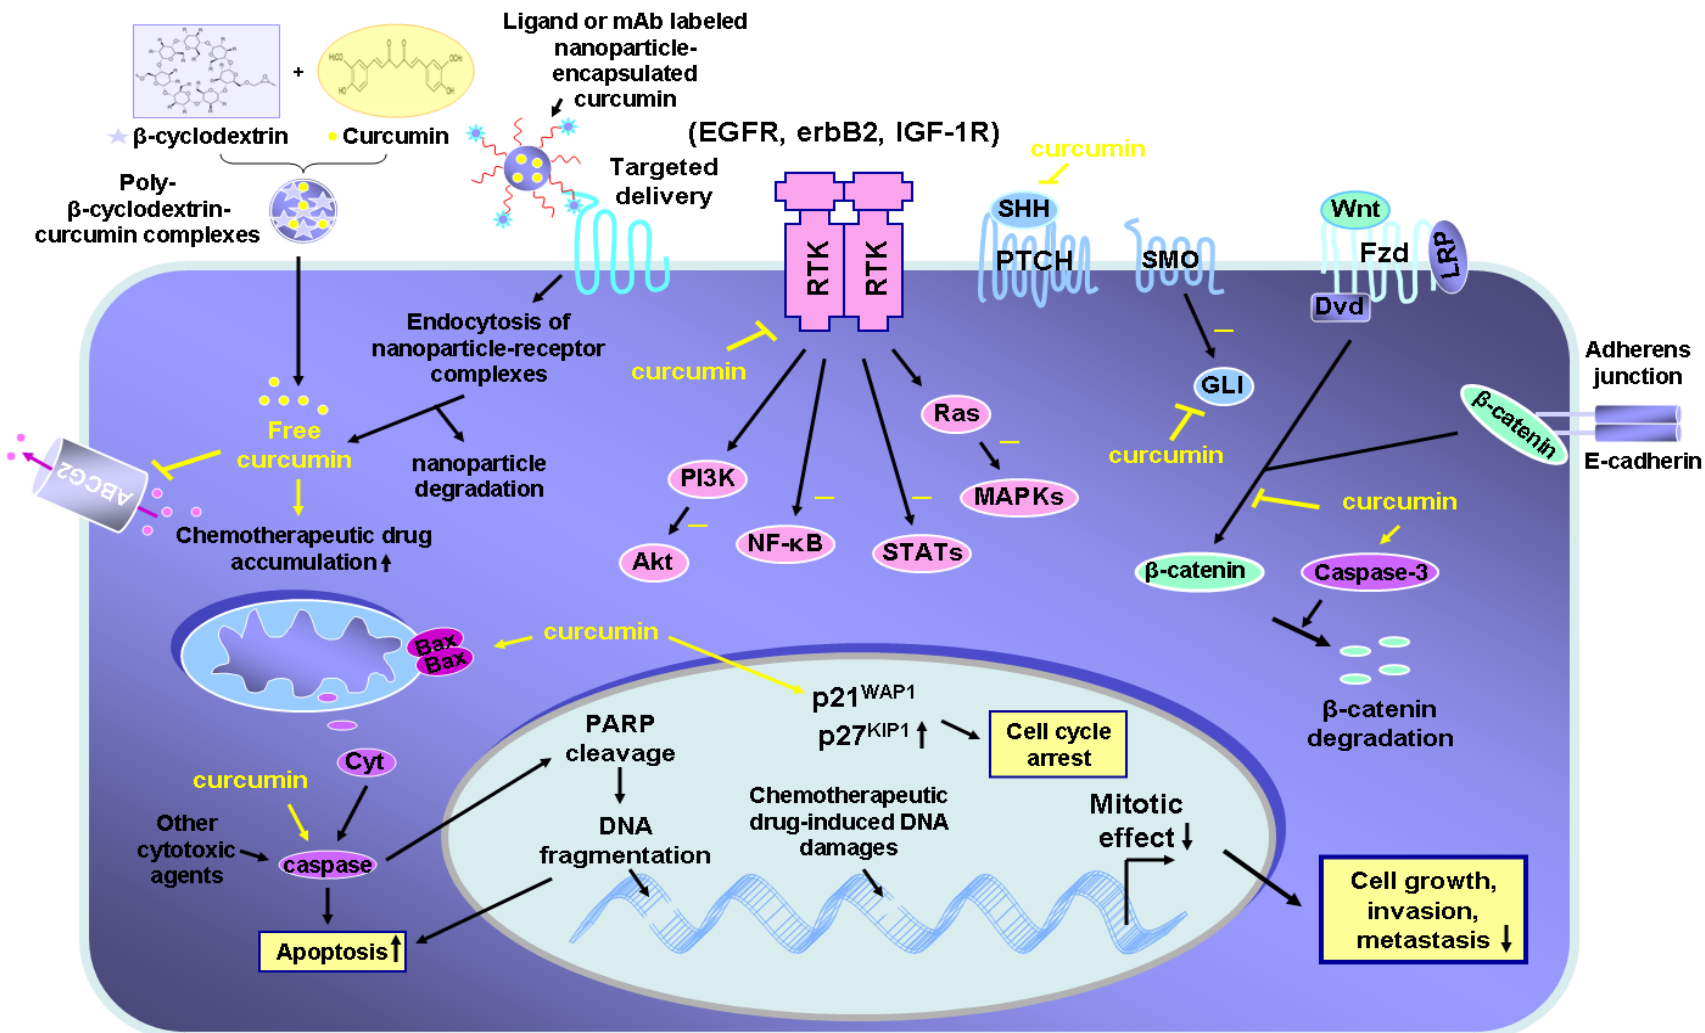

Supplement: MOESM2 [file 9641050]
